# Supplementary material
Source: PubMed Central journal article supplement (PMC4791693)
Supplement: eye2015232x1.pdf [file eye2015232x1.pdf]

**Supplemental Table 1.** Linear regression analysis for the association between the measurements of CT and OPA.

|                      | Subfoveal CT | Nasal 1.5 mm CT | Temporal 1.5 mm CT | Nasal 3 mm CT | Temporal 3 mm CT |
|----------------------|--------------|-----------------|--------------------|---------------|------------------|
| <b>DME (OPA)</b>     |              |                 |                    |               |                  |
| <i>B</i>             | 0.187        | 0.100           | 0.122              | 0.013         | 0.089            |
| <i>p</i>             | 0.298        | 0.579           | 0.498              | 0.943         | 0.622            |
| <b>Control (OPA)</b> |              |                 |                    |               |                  |
| <i>B</i>             | 0.178        | 0.198           | 0.176              | 0.177         | 0.169            |
| <i>p</i>             | 0.314        | 0.262           | 0.319              | 0.316         | 0.340            |

DME=Diabetic macular edema, OPA=Ocular pulse amplitude, CT=Choroidal thickness, mm=millimeters

P < 0.05 indicates statistically significance
